# Supplementary material for: Persistent luminescent nanoparticles for plant imaging: toward exploring the distribution of nanoparticles in plants
Source: Royal Society of Chemistry journal article supplement (doi:10.1039/d3tb00517h), 2023-01-01
Supplement: d3tb00517h1.pdf [file d3tb00517h1.pdf]

## Supplementary information

### **Persistent luminescence nanoparticles for plant imaging: Toward exploring distribution of nanoparticles in plants**

Kexin Yu,<sup>a,b</sup> Xia Sun,<sup>\*c</sup> Ruoping Wang,<sup>a,b</sup> Peng Lin,<sup>a,b</sup> Liang Song,<sup>a,b</sup> Junpeng Shi,<sup>a,b</sup>  
Fangrong Zhang<sup>\*d</sup> and Yun Zhang<sup>\*a,b</sup>

a State Key Laboratory of Structural Chemistry, Fujian Institute of Research on the Structure of Matter, Chinese Academy of Sciences, Fuzhou 350002, PR China

b Xiamen Key Laboratory of Rare Earth Photoelectric Functional Materials, Xiamen Institute of Rare Earth Materials, Haixi Institute, Chinese Academy of Sciences, Xiamen 361021, PR China

c Fujian Science and Technology Innovation Laboratory for Optoelectronic Information of China, Fuzhou 350108, PR China

d School of Basic Medical Sciences, Fujian Medical University, Fuzhou 350122, China

\* Correspondence to: State Key Laboratory of Structural Chemistry, Fujian Institute of Research on the Structure of Matter, Chinese Academy of Sciences, Fuzhou 350002, PR China.

Corresponding author.

*E-mail addresses:* [zhangy@fjirsm.ac.cn](mailto:zhangy@fjirsm.ac.cn) (Y. Zhang), [fangrongzhang@fjmu.edu.cn](mailto:fangrongzhang@fjmu.edu.cn) (F. Zhang)  
[sunxia@fjoel.cn](mailto:sunxia@fjoel.cn) (X. Sun).

## Table of Contents

Figure S1. Photoluminescence excitation spectrum

Figure S2. Photoluminescence emission spectrum

Figure S3. Emission spectrum of excitation light

Figure S4. TEM images of ZGGC(+) and ZGGC(-) nanoparticles

Figure S5. TGA curves of ZGGC, ZGGC(+) and ZGGC(-)

Figure S6. PersL images of ZGGC(+) and ZGGC(-) during the decay time

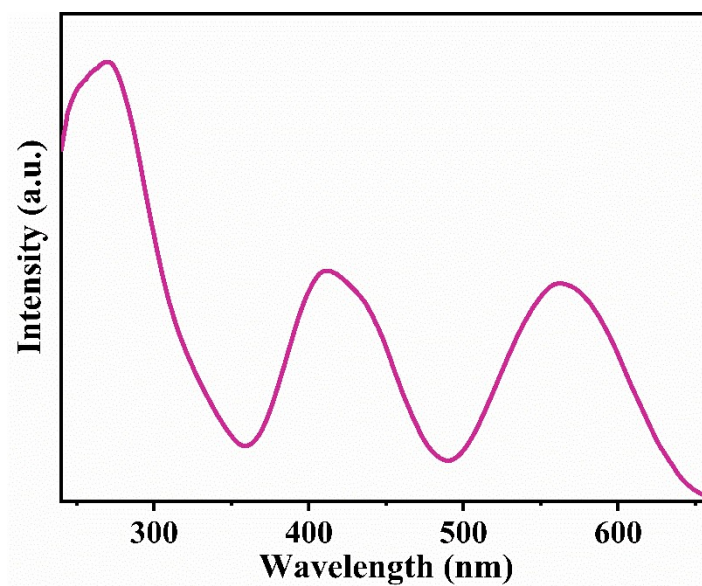

**Figure S1.** Photoluminescence excitation spectrum of ZGGC, monitored at 698 nm

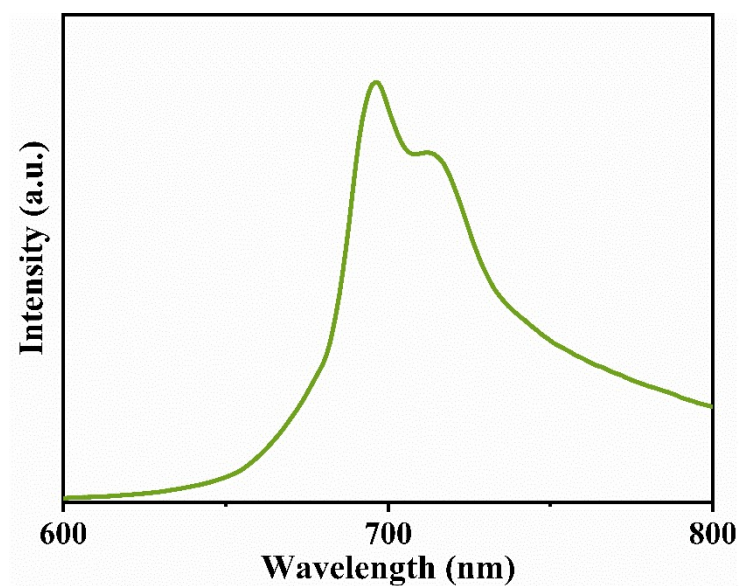

**Figure S2.** Photoluminescence emission spectrum of ZGGC, excitation at 265 nm

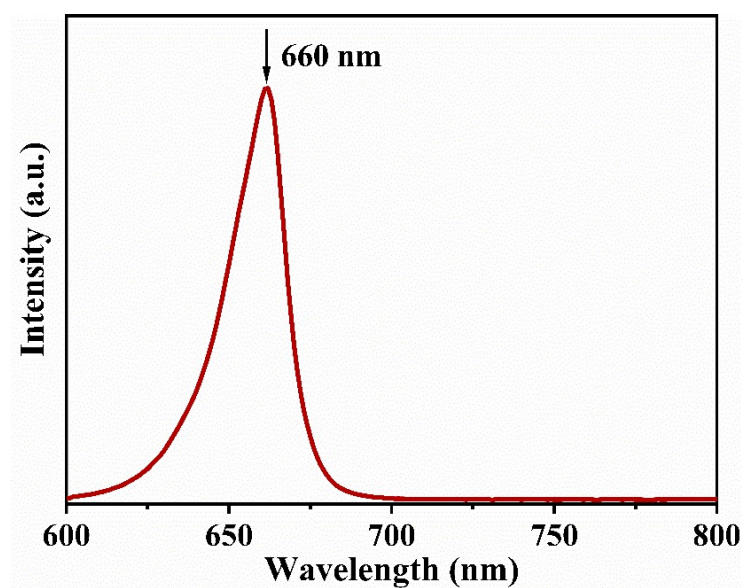

**Figure S3.** Emission spectrum of excitation light (LED lamp)

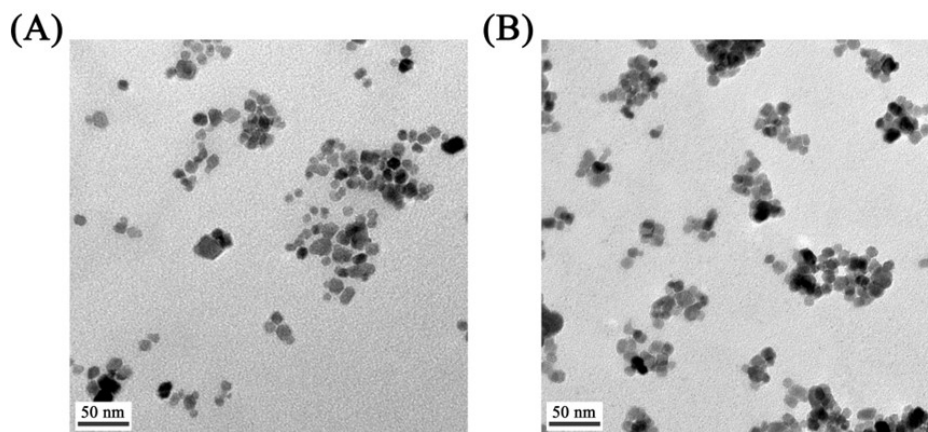

**Figure S4.** TEM images of ZGGC(+) nanoparticles (A) and ZGGC(-) nanoparticles (B).

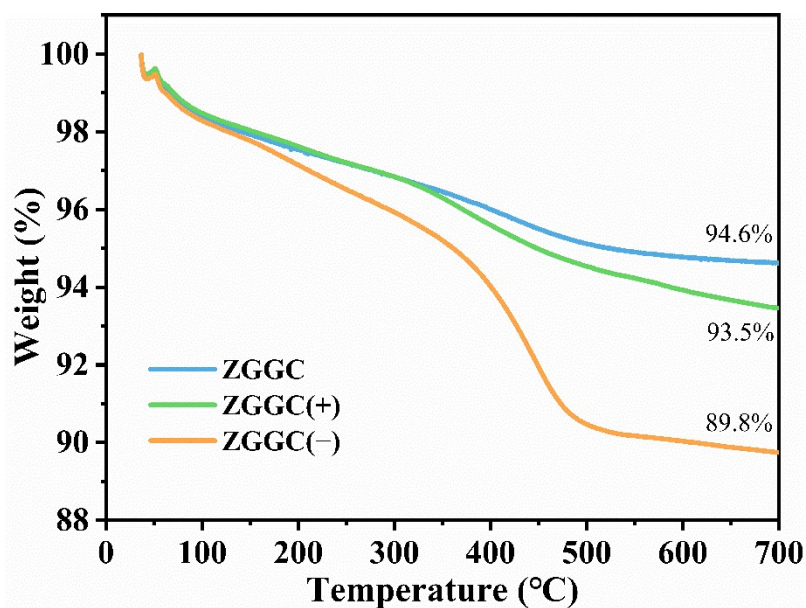

**Figure S5.** TGA curves of ZGGC, ZGGC(+) and ZGGC(-)

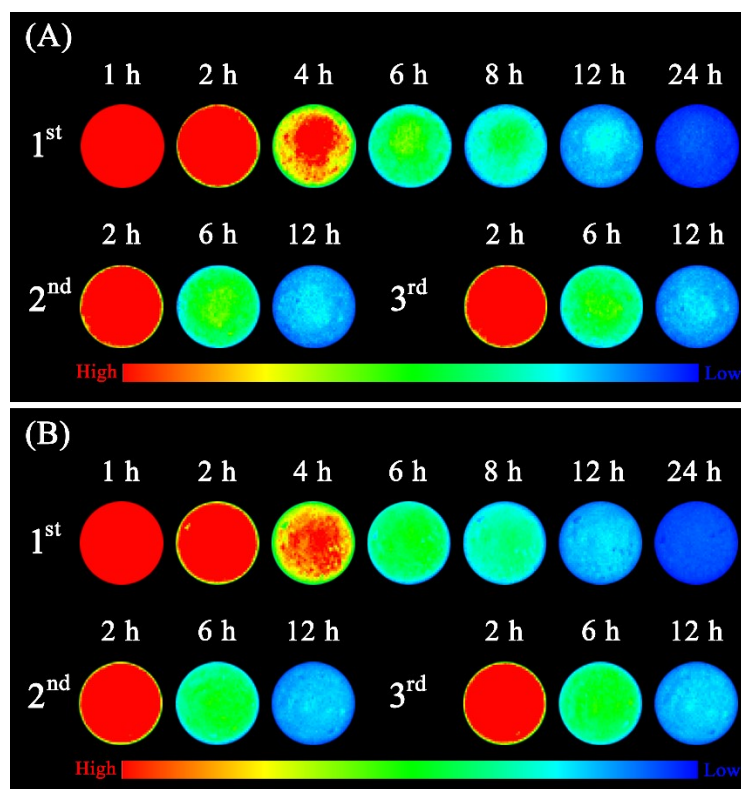

**Figure S6.** PersL signals of ZGGC(+) powders (A) and ZGGC(-) powders (B) collected by a CCD camera at different intervals after receiving LED lamp (~660 nm) light irradiation for 5 min. The exposure time was 120 s.
